# Supplementary material for: A Universal Oligonucleotide Microarray with a Minimal Number of Probes for the Detection and Identification of Viroids at the Genus Level
Source: PLoS One. 2013 May 29;8(5):e64474. doi: 10.1371/journal.pone.0064474 (PMC3667192; doi:10.1371/journal.pone.0064474)
Supplement: Table S1 — Annotation of probes on the viroid detection microarray. (XLSX) [file pone.0064474.s001.xlsx]

## Sheet: Probe Sequences
Afcv1	GAGCGCCCGGTCGTGGATACCTAGGATTCCCTTGTTTGGG
Afcv2	TAACTGGAACGCGCTGTTGCGCTCGCTAGCCAGACCTGCA
Afcv3	AGGTGCGGCGAATCGGATAACGCTAGCCGTCCTCCAATGG
Afcv4	CGGCGAGAAGAACGCTATCCGTCCTCCAGTGGAAGAACTG
Afcv5	ATTACACGCAAGCCGCATGCCTGCATCGGGATCCTAGAAA
Afcv6	GAAACACCGTGGGTACCCGCTGTAGCGTAGACCTCGTCTG
Afcv7	GGTTCTCGTGATTCAACCGAAGCCGCTAGCTCGCATCGGG
Afcv8	GGTTCCTGTGATTACACGCCGAAGCCGCATAGCCTGCATC
Apsc1	GGAGAAGAAGGAACTCACCTGTCGTCGTCAACGAAGGCCA
Apsc2	TCGTCGACGAAGGCAGCTAAGTTGGTGACGCCGAGTGGAG
Apsc3	AGTCTCCGCTAGTCGGAAAGACTCCGCATCCTCCGGCAGA
Apsc4	TTCGCCTACAAGAACGTACGGTGTTGAGGCCCTGTCCGCC
Apsc5	GTGCGGTTCCTGTGGTTCGCGCCGCCAACGCAGATAGATA
Apsc6	AAACTAATGTACTTTGACGCAGCGGCGGGTGGGTTCCCAG
Apsc7	GGGACCACGCTGCTCTGGGCGGAAGAGTCTTCTGACACTT
Apsc8	TGGTTACACCTCGGAAGGCCTCCGCGGACCTGCAGAGAAA
Apsc9	ACGAAGGCCGGTGAGAAAGGAGCTGGCAGCACTAACCTGA
Apsc10	AACCAGCGTTGCTTCCTGCCTGAGCCTCGTCTTCTGTCCC
Apsc11	CAAACTCGATGAAGAGCGTCAGCGGACGGCCTCTGAGACG
Apsc12	CTAGCCTATTCAGCTTCGCGTCCTTGAGGCCTGGCGTAAC
Apsc13	CTGGAGCGCGCGGCTGTGAATAATCCCTCCTTTGGAGAAA
Apsc14	CTCTCTACCAGTCGCGTGTTGACTCTCAAGCCCACCCGCA
Apsc15	TTTGCCTATTCAGCTTCGCGTCTCTGAGGCTCGGCGTAAC
Apsc16	AAATAAATACAGAGAGGGAAAGGGAAACTTACCTGTCGTC
Apsc17	TCGCGTTCACCAACGCAGGTCGATAAAGAATCCGAGGAGA
Apsc18	GGACTTTCTTCTATCTCCGAAGCCGGTTTGAGGCCCGGCG
Apsc19	TCGCGGCCGATCCTCTGGAGCTCTGCTCTAAGATCTTCGC
Apsc20	TGATCTTGCTTGTTCCAACGAGTCCCGCGAGTGGAATCCC
Apsc21	GAGGTCCAAGATGTACCACAAACGAGGCCTTTGGGCTATC
Apsc22	ATGTCTCCACGAGAGGACTCAACAGGTGAAGAGACTTACC
Apsc23	CCTGGGCGCTGGCTGGGTCGTATGGGATTGGTTAATCGCT
Apsc24	TGTCGTCGTCGAGGAAGGCTGGTAAGCCGTCGAGGTCCAA
Apsc25	GATCGATGATATTCCTGTGGTGGCCGCCTGACCAGGTCTA
Apsc26	GAGCACCTCCAGCCGGCTCTATTGCCTATAGCAGCTGGTG
Apsc27	TCGAGCGGACTTCAGTGAGTCGCCCTAATCCTAATCTGTT
Apsc28	TTTCTCTTAAGGTCTGGCAGGGAGTGGAGCTCCCAGGGTA
Apsc29	GTCGTGCTCTTGGAGGAAACTCCTTTGAGACTTGACCGGC
Apsc30	GCTGGAGCGCGAGCCTGTGAGTAATTGCTCCTCTGGAGAA
Apsc31	CCTCCGAGACGAGCGATGGACAGTAGAGCTTCTGCTCCTA
Apsc32	GACTCGTTGTCGAATAAGGGCCTAGAAGCTGGGTCGGGCG
Apsc33	ACTAGGCAGCTCTCCGACCCTCAGAATTTCTCTTCAGGCC
Apsc34	TGACGCACGTAGCTGCGCAAATCTCTCACGAGAGGAACTC
Apsc35	GCTGAGTTGAGCTTCGCTGCTATCTCTTCTAAGCTGTAAC
Avsu1	ACCTTGCGAGACTCATCAGTGTTCTTCCCATCTTTCCCTG
Avsu2	CAGAGTCGGAAAGTCGGAACAGACCTGGTTTCGTCAAACA
Avsu3	ACTCTGANTTTCGACTTAAGGACGCAGGCGGCGACCCGCC
Avsu4	CACCACGACTCCTCCTTCTCTCACAAGTCGAAACTCAGAG
Avsu5	NAGTTAGCCGATGCTTATTCCTCAGATACCGTCACTCCTC
Coca1	CCTGCGTGGAATGGCTCCTTCTTCACACCAGCCGGAGTTG
Coca2	CGTGACTTACCTGTATGGTGGCAAGGGCTCGAAGAGGGAT
Coca3	TACCCGGTGAATACAACTCTTGAGCGCCGAGCTTTACCTG
Coca4	GTCGCTTCTTCCTTCGCGACCTGAGATAGAAACTACCCGG
Coca5	CTACCCGGTGGATAGAACTCTTGGGTTGTTCCTCCCAGGC
Coca6	TTGGGTTGTCCCTCCCAGGCTTGTTATAATAAATGGCCCG
Coca7	TGGGTCGATCGTGCGCGTTGGAGGAGACTCCTTCGTAGCT
Coca8	AACCTCAAGCGAATCTGGGAAGGGAGCGTACCTGGGTCGA
Coca9	CCGGTGGATACAACTCACGCGGCTCTTACCTGTTGTTAGT
Cole1	AGCTTACCTGGGTTCCCTGGCAGCGCTGCAACGGAATTCA
Cole2	GTTCCTGCTCCCACGCAGCGATTGCAAAGGATCCGGTTCG
Cole3	GGTACACCTCCGAAGGCGCGCTAGGCGAGAAGAGAGTAAA
Cole4	GTTCGTGCGAGAGCTTCGCTCGCGAACTCTTCGTGGAACG
Cole5	TCTTCTCCGTAGGACTCTTCGGCTCTTCGCGGGTACCCAG
Cole6	TCTTGTTCGTGTCGTGGAACGGCTCCCGTGTACGCTGGTG
Elvd1	AGAGCTTTAAATTCGGAGGATTCGACCTTAAATCGTTCCT
Elvd2	TTCAAGGATGTGTTCCCTAGGAGGGTGAGTGTACCTCTTT
Elvd3	TGTACCGTTTCGCCCTTTCGGGCTCATCAGGGAAAGCGCA
Elvd4	TGGATTGCTCCGGTCTTCCAGGAGAGATAGAGGACGACCT
Host1	TGTCTATCTGAGCCTCTGCCGCGGATCCTCTCTTGAGCCC
Host2	AGCTCTGCCTTCGAAACACCATCGATCGTGCCTTCTTCTT
Host3	TAGGAGAGAGGGCCGCGGTGCTCTGGAGTAGAGGCTTCTT
Host4	TTTACCTTCTTCTGGCTCTTCGAGTGAGACGCGACCGGTG
Host5	GGGCAACTCTTCTCAGAATCCAGCGAGAGGCGTAGGAGAG
Host6	TCGATCGTCCCTTCTTCTTTACCTTCTCCTGGCTCCTGGT
Host7	ACAGATAGACTCGGAGACGGCGCCTTGGAGAGAACTCGGG
Host8	GCGCCACGAGACCTCATCTCCGAGACGGAAGCTTTGTGGT
Pela1	AGGTACCGCCGTAGAAACTGGATTACGACGTCTACCCGGG
Pela2	AAACTGGGTTACGACGCCTACCCGGGATTCAAACCCGGTC
Pela3	GATAGAAAGGCTAAGCACGTCGCATTGACGTAAGGTGGGA
Pela4	GTGCTTAGCACACTGATGAGTCTCTGAAATGAGACGAAAC
Pela5	GGTGGGACTGTTCCTTCAGGGACCAAGCGGTTGGTTCCGA
Pela6	CCTCCACCTTGGAGTGCCCTATTCGGAGCACTGCAGTTCC
Pela7	GGCAGATGGCTGGACGGAGTCTTAGTCCACTCCAGAGGAC
Pela8	TCTCCACAGCCTCGTCAGGAAACCCACTTCAGGTCTCGAC
Pela9	GTCGGTGTCCTGACGAAGATCCATGACAGGATCGAAACCT
Posp1	CGCTCTGGCTACTACCCGGTGGAAACAACTGTAGCTTGAA
Posp2	TCTTTGTTGCTCTCCGGGCGAGGGTGAAAGCCCGTGGAAC
Posp3	TTCTCTCTGGAGACTACCCGGTGGACACTACTGAAGCTTT
Posp4	CCTGGTTGAGACAGGAGTAATCCCAGCTGAAACAGGGTTT
Posp5	AACAGGACCTGGTGTCCTTCCTTTCGCTGCTGGCTCCACA
Posp6	TCGCCCGGAGCTTCTCTGTGCTTAATAGCCGGTGGATACA
Posp7	CGACCGGTGGCATCACCGAGTTTCGCTCAAACCTCAATCT
Posp8	ACCTTCTTTAGCACCGGGCCAGGGAGTTAGCCCTTGGAAC
Posp9	TCCTGGAGAGGTCTTCTGCCCTAGCCCGGTCTTCGAAGCT
Posp10	GGGTCTTGACCAGTGGCGAGCGCCCTGTTCAGATAGGAGT
Posp11	AAAGACCGGAGAACTCCACGCGGCGGAAGAAACAGGAGCT
Posp12	CCCTGTACACACCGCCCGTCACACCCTGGGAATAGGTTTC
Posp13	TCAGCATGCCGCGGTGAATATGTACCCGGGCCCTGTACAC
Posp14	GTTTCGCCCGAAGCATCGGACCAATGATCACCCATGACTT
Posp15	AGAACGGGAGAAGAAAGAGCAAGAGCGGTCTCAGGAGCCC
Posp16	TCTCGTGGTCGAGGGCGTTCGGATCATTCCAGACAGGTGT
Posp17	AAAGCCGGTCTCGGGAGCTTCACTTGGTTCCACCCGGTAA
Posp18	TTTCTTCGGGTTTCCTTCCTCAGTCGACCGGACCGCGTCG
Posp19	CCACAGGTACCACGAGTTTAGTTCCGAGGAACCTCTGCGG

## Sheet: Probe annotation
Family	Genus	NCBI GenusTaxID	Species in NCBI	NCBI SpecTaxID	Species in ICTV	Probes	No. of Probes
Avsunviroidae	Avsunviroid	185758	Avocado sunblotch viroid	12896	Avocado sunblotch viroid	Avsu1;Avsu2;Avsu3;Avsu4;Avsu5	5
Avsunviroidae	Elaviroid	564640	Eggplant latent viroid	219174	Eggplant latent viroid	Elvd1;Elvd2;Elvd3;Elvd4	4
Avsunviroidae	Pelamoviroid	185759	Chrysanthemum chlorotic mottle viroid	68402	Chrysanthemum chlorotic mottle viroid	Pela7;Pela8;Pela9	3
Avsunviroidae	Pelamoviroid	185759	Peach latent mosaic viroid	12894	Peach latent mosaic viroid	Pela1;Pela2;Pela3;Pela4;Pela5;Pela6	6
Pospiviroidae	Apscaviroid	185756	Apple dimple fruit viroid	73494	Apple dimple fruit viroid	Apsc21;Apsc22;Apsc24;Apsc28;Apsc29;Apsc33;Apsc34	7
Pospiviroidae	Apscaviroid	185756	Apple scar skin viroid	12895	Apple scar skin viroid	Apsc1;Apsc17;Apsc4;Apsc5;Apsc6;Apsc9	6
Pospiviroidae	Apscaviroid	185756	Australian grapevine viroid	190810	Australian grapevine viroid
Pospiviroidae	Apscaviroid	185756	Citrus bent leaf viroid	12906	Citrus bent leaf viroid	Apsc35	1
Pospiviroidae	Apscaviroid	185756	Citrus dwarfing viroid	551523	Citrus dwarfing viroid	Apsc1;Apsc16;Apsc2;Apsc27;Apsc3	5
Pospiviroidae	Apscaviroid	185756	Citrus viroid V	459949	Citrus viroid V	Apsc1;Apsc19;Apsc24	3
Pospiviroidae	Apscaviroid	185756	Citrus viroid VI	697192	Citrus viroid VI	Apsc1;Apsc11;Apsc14;Apsc31	4
Pospiviroidae	Apscaviroid	185756	Grapevine yellow speckle viroid	12905		Apsc12;Apsc15;Apsc20;Apsc7;Apsc8	5
Pospiviroidae	Apscaviroid	185756	Grapevine yellow speckle viroid 1	12904	Grapevine yellow speckle viroid 1	Apsc12;Apsc15;Apsc20;Apsc7;Apsc8	5
Pospiviroidae	Apscaviroid	185756	Grapevine yellow speckle viroid 2	46342	Grapevine yellow speckle viroid 2	Apsc18;Apsc20;Apsc8	3
Pospiviroidae	Apscaviroid	185756	Pear blister canker viroid	12783	Pear blister canker viroid	Apsc10;Apsc13;Apsc23;Apsc25;Apsc26;Apsc30;Apsc32	7
Pospiviroidae	Cocadviroid	185754	Citrus bark cracking viroid	12898	Citrus bark cracking viroid	Coca3;Coca4;Coca5;Coca6	4
Pospiviroidae	Cocadviroid	185754	Coconut cadang-cadang viroid	36453	Coconut cadang-cadang viroid	Coca7;Coca8;Coca9	3
Pospiviroidae	Cocadviroid	185754	Coconut tinangaja viroid	12889	Coconut tinangaja viroid	Coca5	1
Pospiviroidae	Cocadviroid	185754	Hop latent viroid	12907	Hop latent viroid	Coca1;Coca2;Coca3;Coca5	4
Pospiviroidae	Coleviroid	185757	Coleus blumei viroid	12899		Cole1;Cole2;Cole5	3
Pospiviroidae	Coleviroid	185757	Coleus blumei viroid 1	192025	Coleus blumei viroid 1	Cole1;Cole6	2
Pospiviroidae	Coleviroid	185757	Coleus blumei viroid 2	192026	Coleus blumei viroid 2	Cole1;Cole3	2
Pospiviroidae	Coleviroid	185757	Coleus blumei viroid 3	192027	Coleus blumei viroid 3	Cole1;Cole2;Cole3;Cole5	4
Pospiviroidae	Coleviroid	185757	Coleus blumei viroid 5	598747		Cole1;Cole2;Cole4	3
Pospiviroidae	Coleviroid	185757	Coleus blumei viroid 6	651134		Cole1;Cole2;Cole3;Cole4	4
Pospiviroidae	Hostuviroid	147262	Hop stunt viroid	12893	Hop stunt viroid	Host1;Host2;Host3;Host4;Host5;Host6;Host7;Host8	8
Pospiviroidae	Pospiviroid	185753	Chrysanthemum stunt viroid	12897	Chrysanthemum stunt viroid	Posp1;Posp8;Posp9	3
Pospiviroidae	Pospiviroid	185753	Citrus exocortis viroid	12890	Citrus exocortis viroid	Posp1;Posp12;Posp13;Posp14;Posp2;Posp3;Posp5;Posp6	8
Pospiviroidae	Pospiviroid	185753	Columnea latent viroid	12901	Columnea latent viroid	Posp10;Posp15;Posp16;Posp18;Posp19;Posp2;Posp4;Posp7	8
Pospiviroidae	Pospiviroid	185753	Iresine viroid 1	53193	Iresine viroid 1	Posp1;Posp11	2
Pospiviroidae	Pospiviroid	185753	Mexican papita viroid	79450	Mexican papita viroid	Posp17;Posp18;Posp4	3
Pospiviroidae	Pospiviroid	185753	Pepper chat fruit viroid	574040	Pepper chat fruit viroid	Posp18;Posp4	2
Pospiviroidae	Pospiviroid	185753	Potato spindle tuber viroid	12892	Potato spindle tuber viroid	Posp17;Posp18;Posp19;Posp4	4
Pospiviroidae	Pospiviroid	185753	Tomato apical stunt viroid	12885	Tomato apical stunt viroid	Posp18;Posp2;Posp3;Posp4;Posp9	5
Pospiviroidae	Pospiviroid	185753	Tomato chlorotic dwarf viroid	100785	Tomato chlorotic dwarf viroid	Posp17;Posp19	2
Pospiviroidae	Pospiviroid	185753	Tomato planta macho viroid	12888	Tomato planta macho viroid	Posp18;Posp3;Posp4	3
Unclassified	Unclassified		Apple fruit crinkle viroid	190808		Afcv1;Afcv2;Afcv3;Afcv4;Afcv5;Afcv6;Afcv7;Afcv8	8
